# Supplementary material for: NDRG3 lowers the metastatic potential in prostate cancer as a feedback controller of hypoxia-inducible factors
Source: PubMed Central journal article supplement — Exp Mol Med. 2018 May 14;50(5):61. doi: 10.1038/s12276-018-0089-y (PMC5951909; doi:10.1038/s12276-018-0089-y), 2018-05-14
Supplement: 12276_2018_89_MOESM1_ESM.pdf [file 12276_2018_89_MOESM1_ESM.pdf]

**Table S1. Nucleotide sequences of primers used in RT-PCR.**

| Gene         | Direction | Nucleotide Sequence          |
|--------------|-----------|------------------------------|
| <i>PDK1</i>  | Forward   | 5'-AACCTCTAGGAATACAGC-3'     |
|              | Reverse   | 5'-CCTTTGAGGAAAATTGACAG-3'   |
| <i>BNIP3</i> | Forward   | 5'-TGTTGCAAGCTCAGAAGTAA-3'   |
|              | Reverse   | 5'-TTCTGAAAGTTTTCTTCCA-3'    |
| <i>GAPDH</i> | Forward   | 5'-TGTGGTCATGAGTCCTTCCA-3'   |
|              | Reverse   | 5'-CGAGATCCCTCCAAAATCAA-3'   |
| <i>HIF1A</i> | Forward   | 5'-CCCAGATTCAGGATCAGACA-3'   |
|              | Reverse   | 5'-ACCATCATGTTCCATTTTTTCG-3' |
| <i>HIF2A</i> | Forward   | 5'-TCATCATGTGTGAACCAATC-3'   |
|              | Reverse   | 5'-GAACACCACGTCATTCTTCT-3'   |

**Table S2. Patient information for the prostate cancer tissue array.**

| No. | Age | Sex  | Organ    | Diagnosis      | Gleason score | Stage | Residual tumor | Follow-up month | Survival status | PSA (ng/ml) |
|-----|-----|------|----------|----------------|---------------|-------|----------------|-----------------|-----------------|-------------|
| 1   | 60  | Male | Prostate | adenocarcinoma | 9             | 3     | no             | 60              | alive           | 11.2        |
| 2   | 64  | Male | Prostate | adenocarcinoma | 7             | 2b    | no             | 60              | alive           | 30          |
| 3   | 71  | Male | Prostate | adenocarcinoma | 9             | 3     | yes            | 55              | alive           | 60.4        |
| 4   | 64  | Male | Prostate | adenocarcinoma | 10            | 3     | yes            | 47              | alive           | 7.4         |
| 5   | 59  | Male | Prostate | adenocarcinoma | 9             | 3     | yes            | 44              | alive           | 9.8         |
| 6   | 65  | Male | Prostate | adenocarcinoma | 8             | 3     | yes            | 43              | alive           | 34.9        |
| 7   | 73  | Male | Prostate | adenocarcinoma | 7             | 2b    | yes            | 42              | alive           | 48.1        |
| 8   | 69  | Male | Prostate | adenocarcinoma | 7             | 2b    | no             | 42              | alive           | 10.6        |
| 9   | 62  | Male | Prostate | adenocarcinoma | 7             | 2b    | yes            | 39              | alive           | 37.3        |
| 10  | 66  | Male | Prostate | adenocarcinoma | 9             | 3     | yes            | 39              | alive           | 1.2         |
| 11  | 60  | Male | Prostate | adenocarcinoma | 9             | 3     | yes            | 39              | alive           | 40          |
| 12  | 66  | Male | Prostate | adenocarcinoma | 7             | 3     | yes            | 39              | alive           | 8.4         |
| 13  | 70  | Male | Prostate | adenocarcinoma | 7             | 3     | yes            | 37              | alive           | 7           |
| 14  | 65  | Male | Prostate | adenocarcinoma | 9             | 3     | yes            | 23              | dead            | 17.5        |
| 15  | 67  | Male | Prostate | adenocarcinoma | 9             | 3     | yes            | 34              | alive           | 13.1        |
| 16  | 69  | Male | Prostate | adenocarcinoma | 7             | 3     | yes            | 33              | alive           | 1.1         |
| 17  | 63  | Male | Prostate | adenocarcinoma | 9             | 3     | yes            | 33              | alive           | 11.8        |
| 18  | 69  | Male | Prostate | adenocarcinoma | 7             | 3     | yes            | 27              | alive           | 17.6        |

|    |    |      |          |                |    |    |     |    |       |      |
|----|----|------|----------|----------------|----|----|-----|----|-------|------|
| 19 | 70 | Male | Prostate | adenocarcinoma | 7  | 3  | yes | 26 | alive | 9    |
| 20 | 58 | Male | Prostate | adenocarcinoma | 9  | 3  | no  | 26 | alive | 5.8  |
| 21 | 58 | Male | Prostate | adenocarcinoma | 7  | 3  | yes | 24 | alive | 15.8 |
| 22 | 71 | Male | Prostate | adenocarcinoma | 7  | 2b | yes | 24 | alive | 31.4 |
| 23 | 70 | Male | Prostate | adenocarcinoma | 7  | 3  | yes | 19 | alive | 14.4 |
| 24 | 59 | Male | Prostate | adenocarcinoma | 6  | 2a | no  | 18 | alive | 18.3 |
| 25 | 63 | Male | Prostate | adenocarcinoma | 9  | 3  | yes | 17 | alive | 16.6 |
| 26 | 72 | Male | Prostate | adenocarcinoma | 9  | 3  | yes | 16 | alive | .    |
| 27 | 66 | Male | Prostate | adenocarcinoma | 8  | 2  | yes | 17 | dead  | 10.8 |
| 28 | 70 | Male | Prostate | adenocarcinoma | 6  | 3  | yes | 16 | alive | 10.8 |
| 29 | 70 | Male | Prostate | adenocarcinoma | 7  | 2b | no  | 15 | alive | .    |
| 30 | 68 | Male | Prostate | adenocarcinoma | 8  | 3  | yes | 15 | alive | 26.9 |
| 31 | 63 | Male | Prostate | adenocarcinoma | 10 | 3  | yes | 15 | alive | .    |
| 32 | 57 | Male | Prostate | adenocarcinoma | 7  | 3  | yes | 15 | alive | 25   |
| 33 | 72 | Male | Prostate | adenocarcinoma | 8  | 2b | yes | 15 | alive | 16.8 |
| 34 | 70 | Male | Prostate | adenocarcinoma | 8  | 3  | yes | 15 | alive | 0.5  |
| 35 | 75 | Male | Prostate | adenocarcinoma | 9  | 3  | yes | 15 | alive | 98   |
| 36 | 62 | Male | Prostate | adenocarcinoma | 9  | 3  | yes | 15 | alive | .    |
| 37 | 63 | Male | Prostate | adenocarcinoma | 9  | 3  | yes | 14 | alive | 91   |
| 38 | 53 | Male | Prostate | adenocarcinoma | 9  | 3  | yes | 17 | dead  | 161  |
| 39 | 63 | Male | Prostate | adenocarcinoma | 8  | 3  | yes | 13 | alive | 13   |
| 40 | 44 | Male | Prostate | adenocarcinoma | 7  | 3  | yes | 11 | alive | .    |
| 41 | 69 | Male | Prostate | normal         | .  | .  | .   | .  | .     | .    |
| 42 | 62 | Male | Prostate | normal         | .  | .  | .   | .  | .     | .    |
| 43 | 66 | Male | Prostate | normal         | .  | .  | .   | .  | .     | .    |
| 44 | 65 | Male | Prostate | normal         | .  | .  | .   | .  | .     | .    |
| 45 | 69 | Male | Prostate | normal         | .  | .  | .   | .  | .     | .    |
| 46 | 70 | Male | Prostate | normal         | .  | .  | .   | .  | .     | .    |
| 47 | 70 | Male | Prostate | normal         | .  | .  | .   | .  | .     | .    |
| 48 | 63 | Male | Prostate | normal         | .  | .  | .   | .  | .     | .    |
| 49 | 44 | Male | Prostate | normal         | .  | .  | .   | .  | .     | .    |

**Table S3. Core enriched gene list for the gene set PID\_HIF1\_TFPATHWAY**

| Probe  | Gene Symbol | Gene Title                                                                              | Rank in gene list | Rank metric score | Running ES | Core enrichment |
|--------|-------------|-----------------------------------------------------------------------------------------|-------------------|-------------------|------------|-----------------|
| HK2    | HK2         | hexokinase 2                                                                            | 156               | 0.353764          | 0.091885   | Yes             |
| NCOA1  | NCOA1       | nuclear receptor coactivator 1                                                          | 225               | 0.328689          | 0.188197   | Yes             |
| HIF1A  | HIF1A       | hypoxia-inducible factor 1, alpha subunit (basic helix-loop-helix transcription factor) | 261               | 0.318103          | 0.285788   | Yes             |
| RORA   | RORA        | RAR-related orphan receptor A                                                           | 338               | 0.299635          | 0.371595   | Yes             |
| TFRC   | TFRC        | transferrin receptor (p90, CD71)                                                        | 494               | 0.266397          | 0.435452   | Yes             |
| HK1    | HK1         | hexokinase 1                                                                            | 591               | 0.253815          | 0.503641   | Yes             |
| EGLN1  | EGLN1       | egl nine homolog 1 (C. elegans)                                                         | 810               | 0.225232          | 0.545267   | Yes             |
| ETS1   | ETS1        | v-ets erythroblastosis virus E26 oncogene homolog 1 (avian)                             | 830               | 0.223343          | 0.614579   | Yes             |
| NCOA2  | NCOA2       | nuclear receptor coactivator 2                                                          | 1148              | 0.193335          | 0.631844   | Yes             |
| PFKFB3 | PFKFB3      | 6-phosphofructo-2-kinase/fructose-2,6-biphosphatase 3                                   | 1445              | 0.16977           | 0.644497   | Yes             |

**Table S4. Core enriched gene list for the gene set ELVIDGE\_HYPOXIA\_UP**

| Probe   | Gene Symbol | Gene Title                                                                | Rank in gene list | Rank metric score | Running ES | Core enrichment |
|---------|-------------|---------------------------------------------------------------------------|-------------------|-------------------|------------|-----------------|
| HEY1    | HEY1        | hairy/enhancer-of-split related with YRPW motif 1                         | 17                | 0.459048          | 0.041123   | Yes             |
| DTNA    | DTNA        | dystrobrevin, alpha                                                       | 130               | 0.364195          | 0.059669   | Yes             |
| HK2     | HK2         | hexokinase 2                                                              | 156               | 0.353764          | 0.08966    | Yes             |
| ERO1L   | ERO1L       | ERO1-like (S. cerevisiae)                                                 | 219               | 0.330226          | 0.11213    | Yes             |
| KLHL24  | KLHL24      | kelch-like 24 (Drosophila)                                                | 220               | 0.330224          | 0.14346    | Yes             |
| DDIT4   | DDIT4       | DNA-damage-inducible transcript 4                                         | 247               | 0.320453          | 0.170147   | Yes             |
| PDK1    | PDK1        | pyruvate dehydrogenase kinase, isozyme 1                                  | 271               | 0.316203          | 0.19686    | Yes             |
| ATXN1   | ATXN1       | ataxin 1                                                                  | 317               | 0.304557          | 0.219324   | Yes             |
| WSB1    | WSB1        | WD repeat and SOCS box-containing 1                                       | 349               | 0.296292          | 0.243004   | Yes             |
| TRA2A   | TRA2A       | -                                                                         | 351               | 0.295798          | 0.270925   | Yes             |
| DST     | DST         | dystonin                                                                  | 398               | 0.285046          | 0.291395   | Yes             |
| RRAGD   | RRAGD       | Ras-related GTP binding D                                                 | 402               | 0.284205          | 0.31793    | Yes             |
| EFNA3   | EFNA3       | ephrin-A3                                                                 | 480               | 0.270144          | 0.332556   | Yes             |
| YPEL1   | YPEL1       | yippee-like 1 (Drosophila)                                                | 524               | 0.26243           | 0.351309   | Yes             |
| KLF7    | KLF7        | Kruppel-like factor 7 (ubiquitous)                                        | 756               | 0.232209          | 0.340325   | Yes             |
| NR3C1   | NR3C1       | nuclear receptor subfamily 3, group C, member 1 (glucocorticoid receptor) | 801               | 0.226952          | 0.355569   | Yes             |
| EGLN1   | EGLN1       | egl nine homolog 1 (C. elegans)                                           | 810               | 0.225232          | 0.375795   | Yes             |
| SAMD4A  | SAMD4A      | sterile alpha motif domain containing 4A                                  | 838               | 0.222161          | 0.393014   | Yes             |
| TGFBI   | TGFBI       | transforming growth factor, beta-induced, 68kDa                           | 873               | 0.219064          | 0.408938   | Yes             |
| STC1    | STC1        | stanniocalcin 1                                                           | 877               | 0.218482          | 0.429238   | Yes             |
| BBX     | BBX         | bobby sox homolog (Drosophila)                                            | 922               | 0.214723          | 0.443322   | Yes             |
| TMEM45A | TMEM45A     | transmembrane protein 45A                                                 | 946               | 0.212318          | 0.460179   | Yes             |
| ANKZF1  | ANKZF1      | ankyrin repeat and zinc finger domain containing 1                        | 1250              | 0.182756          | 0.434213   | Yes             |
| ITPR1   | ITPR1       | inositol 1,4,5-triphosphate receptor, type 1                              | 1362              | 0.174956          | 0.434949   | Yes             |
| STC2    | STC2        | stanniocalcin 2                                                           | 1371              | 0.174458          | 0.450357   | Yes             |
| PFKFB3  | PFKFB3      | 6-phosphofructo-2-kinase/fructose-2,6-biphosphatase 3                     | 1445              | 0.16977           | 0.456031   | Yes             |
| YEATS2  | YEATS2      | YEATS domain containing 2                                                 | 1452              | 0.169411          | 0.471247   | Yes             |

**Table S5. Core enriched gene list for the gene set CHANDRAN\_METASTASIS\_UP**

| Probe    | Gene Symbol | Gene Title                                                                   | Rank in gene list | Rank metric score | Running ES | Core enrichment |
|----------|-------------|------------------------------------------------------------------------------|-------------------|-------------------|------------|-----------------|
| KIAA1267 | KIAA1267    | KIAA1267                                                                     | 4                 | 0.497317          | 0.018461   | Yes             |
| EIF2C2   | EIF2C2      | eukaryotic translation initiation factor 2C, 2                               | 5                 | 0.496974          | 0.037485   | Yes             |
| PABPC1   | PABPC1      | poly(A) binding protein, cytoplasmic 1                                       | 6                 | 0.495015          | 0.056434   | Yes             |
| PCBP2    | PCBP2       | poly(rC) binding protein 2                                                   | 13                | 0.468056          | 0.073487   | Yes             |
| COX19    | COX19       | COX19 cytochrome c oxidase assembly homolog (S. cerevisiae)                  | 22                | 0.453974          | 0.089713   | Yes             |
| PLXNA1   | PLXNA1      | plexin A1                                                                    | 27                | 0.445768          | 0.106201   | Yes             |
| NCAPH2   | NCAPH2      | non-SMC condensin II complex, subunit H2                                     | 30                | 0.438933          | 0.122715   | Yes             |
| MAP3K8   | MAP3K8      | mitogen-activated protein kinase kinase kinase 8                             | 32                | 0.437222          | 0.139307   | Yes             |
| MLL3     | MLL3        | myeloid/lymphoid or mixed-lineage leukemia 3                                 | 37                | 0.432568          | 0.15529    | Yes             |
| SDCCAG3  | SDCCAG3     | serologically defined colon cancer antigen 3                                 | 39                | 0.431612          | 0.171668   | Yes             |
| IBTK     | IBTK        | inhibitor of Bruton agammaglobulinemia tyrosine kinase                       | 54                | 0.415719          | 0.185565   | Yes             |
| CPEB4    | CPEB4       | cytoplasmic polyadenylation element binding protein 4                        | 62                | 0.410953          | 0.200288   | Yes             |
| BIRC6    | BIRC6       | baculoviral IAP repeat-containing 6 (apollon)                                | 81                | 0.40106           | 0.213048   | Yes             |
| TRIO     | TRIO        | triple functional domain (PTPRF interacting)                                 | 88                | 0.395203          | 0.227313   | Yes             |
| MLL5     | MLL5        | myeloid/lymphoid or mixed-lineage leukemia 5 (trithorax homolog, Drosophila) | 93                | 0.390662          | 0.241691   | Yes             |
| HMBOX1   | HMBOX1      | homeobox containing 1                                                        | 103               | 0.385236          | 0.255141   | Yes             |
| PVT1     | PVT1        | Pvt1 oncogene homolog, MYC activator (mouse)                                 | 111               | 0.376192          | 0.268534   | Yes             |
| RAB12    | RAB12       | RAB12, member RAS oncogene family                                            | 112               | 0.375525          | 0.282909   | Yes             |
| MALAT1   | MALAT1      | metastasis associated lung adenocarcinoma transcript 1 (non-coding RNA)      | 113               | 0.374778          | 0.297255   | Yes             |
| CHORDC1  | CHORDC1     | cysteine and histidine-rich domain (CHORD)-containing 1                      | 114               | 0.374647          | 0.311597   | Yes             |
| HCG18    | HCG18       | HLA complex group 18                                                         | 117               | 0.372864          | 0.325582   | Yes             |
| TARS     | TARS        | threonyl-tRNA synthetase                                                     | 118               | 0.372496          | 0.339841   | Yes             |
| RASAL2   | RASAL2      | RAS protein activator like 2                                                 | 122               | 0.3708            | 0.353603   | Yes             |
| FNBP4    | FNBP4       | formin binding protein 4                                                     | 123               | 0.369849          | 0.36776    | Yes             |
| MSI2     | MSI2        | musashi homolog 2 (Drosophila)                                               | 127               | 0.366204          | 0.381346   | Yes             |
| LRRC58   | LRRC58      | leucine rich repeat containing 58                                            | 128               | 0.366168          | 0.395363   | Yes             |
| SNORA28  | SNORA28     | small nucleolar RNA, H/ACA box 28                                            | 129               | 0.365658          | 0.40936    | Yes             |
| DONSON   | DONSON      | downstream neighbor of SON                                                   | 131               | 0.36294           | 0.42311    | Yes             |
| TMEM70   | TMEM70      | transmembrane protein 70                                                     | 170               | 0.349713          | 0.431024   | Yes             |

|          |          |                                                                                               |     |          |          |     |
|----------|----------|-----------------------------------------------------------------------------------------------|-----|----------|----------|-----|
| ARHGAP1  | ARHGAP1  | Rho GTPase activating protein 1                                                               | 179 | 0.344033 | 0.443041 | Yes |
| ADD1     | ADD1     | adducin 1 (alpha)                                                                             | 184 | 0.342645 | 0.455582 | Yes |
| SMCR3    | SMCR3    | Smith-Magenis syndrome chromosome region, candidate 3                                         | 196 | 0.338658 | 0.466961 | Yes |
| LONRF2   | LONRF2   | LON peptidase N-terminal domain and ring finger 2                                             | 209 | 0.333435 | 0.477997 | Yes |
| GNL3L    | GNL3L    | guanine nucleotide binding protein-like 3 (nucleolar)-like                                    | 223 | 0.328949 | 0.488717 | Yes |
| CBX4     | CBX4     | chromobox homolog 4 (Pc class homolog, Drosophila)                                            | 229 | 0.32713  | 0.500519 | Yes |
| HN1      | HN1      | hematological and neurological expressed 1                                                    | 231 | 0.325315 | 0.512828 | Yes |
| MORF4L2  | MORF4L2  | mortality factor 4 like 2                                                                     | 234 | 0.324261 | 0.524953 | Yes |
| DDIT4    | DDIT4    | DNA-damage-inducible transcript 4                                                             | 247 | 0.320453 | 0.535491 | Yes |
| FUS      | FUS      | fusion (involved in t(12;16) in malignant liposarcoma)                                        | 253 | 0.31945  | 0.547    | Yes |
| RPL37    | RPL37    | ribosomal protein L37                                                                         | 270 | 0.316271 | 0.556802 | Yes |
| NFATC2IP | NFATC2IP | nuclear factor of activated T-cells, cytoplasmic, calcineurin-dependent 2 interacting protein | 300 | 0.308669 | 0.564442 | Yes |
| MINA     | MINA     | MYC induced nuclear antigen                                                                   | 326 | 0.303237 | 0.572449 | Yes |
| TMSB10   | TMSB10   | thymosin, beta 10                                                                             | 333 | 0.300665 | 0.583095 | Yes |
| LIMD1    | LIMD1    | LIM domains containing 1                                                                      | 353 | 0.29568  | 0.591677 | Yes |
| THBS2    | THBS2    | thrombospondin 2                                                                              | 367 | 0.291194 | 0.600951 | Yes |
| SLC35B3  | SLC35B3  | solute carrier family 35, member B3                                                           | 375 | 0.290295 | 0.611056 | Yes |
| ZNF621   | ZNF621   | zinc finger protein 621                                                                       | 382 | 0.289706 | 0.621282 | Yes |
| RBBP6    | RBBP6    | retinoblastoma binding protein 6                                                              | 416 | 0.282136 | 0.627329 | Yes |
| FN1      | FN1      | fibronectin 1                                                                                 | 419 | 0.281591 | 0.63782  | Yes |
| HPN      | HPN      | hepsin (transmembrane protease, serine 1)                                                     | 439 | 0.277839 | 0.64572  | Yes |
| TBC1D24  | TBC1D24  | TBC1 domain family, member 24                                                                 | 485 | 0.268276 | 0.649509 | Yes |
| RBM39    | RBM39    | RNA binding motif protein 39                                                                  | 529 | 0.261961 | 0.653344 | Yes |
| GSK3B    | GSK3B    | glycogen synthase kinase 3 beta                                                               | 561 | 0.257611 | 0.658741 | Yes |
| LYN      | LYN      | v-yes-1 Yamaguchi sarcoma viral related oncogene homolog                                      | 568 | 0.256619 | 0.6677   | Yes |
| KIAA1147 | KIAA1147 | KIAA1147                                                                                      | 713 | 0.236468 | 0.656015 | Yes |
| ZNF281   | ZNF281   | zinc finger protein 281                                                                       | 743 | 0.233149 | 0.660764 | Yes |
| SOX4     | SOX4     | SRX (sex determining region Y)-box 4                                                          | 786 | 0.228941 | 0.663479 | Yes |
| ATG4D    | ATG4D    | ATG4 autophagy related 4 homolog D (S. cerevisiae)                                            | 834 | 0.222563 | 0.66523  | Yes |
| TAOK1    | TAOK1    | TAO kinase 1                                                                                  | 857 | 0.220173 | 0.67049  | Yes |
| CDC26    | CDC26    | cell division cycle 26                                                                        | 859 | 0.219976 | 0.678767 | Yes |
| ABHD5    | ABHD5    | abhydrolase domain containing 5                                                               | 870 | 0.219402 | 0.685725 | Yes |
| FGFR1OP2 | FGFR1OP2 | FGFR1 oncogene partner 2                                                                      | 885 | 0.217776 | 0.692045 | Yes |
| PRKAB2   | PRKAB2   | protein kinase, AMP-                                                                          | 932 | 0.213831 | 0.693606 | Yes |

|           |           |                                                                     |     |          |          |     |
|-----------|-----------|---------------------------------------------------------------------|-----|----------|----------|-----|
|           |           | activated, beta 2 non-catalytic subunit                             |     |          |          |     |
| LOC642852 | LOC642852 | -                                                                   | 941 | 0.212835 | 0.700602 | Yes |
| LRCH3     | LRCH3     | leucine-rich repeats and calponin homology (CH) domain containing 3 | 947 | 0.212217 | 0.708005 | Yes |

**Table S6. Core enriched gene list for the gene set HALLMARK\_HYPOXIA**

| Probe    | Gene Symbol | Gene Title                                                                | Rank in gene list | Rank metric score | Running ES | Core enrichment |
|----------|-------------|---------------------------------------------------------------------------|-------------------|-------------------|------------|-----------------|
| EXT1     | EXT1        | exostoses (multiple) 1                                                    | 10                | 0.474807          | 0.038659   | Yes             |
| TPD52    | TPD52       | tumor protein D52                                                         | 91                | 0.392801          | 0.060388   | Yes             |
| DTNA     | DTNA        | dystrobrevin, alpha                                                       | 130               | 0.364195          | 0.085705   | Yes             |
| HK2      | HK2         | hexokinase 2                                                              | 156               | 0.353764          | 0.112      | Yes             |
| ERO1L    | ERO1L       | ERO1-like (S. cerevisiae)                                                 | 219               | 0.330226          | 0.131018   | Yes             |
| KLHL24   | KLHL24      | kelch-like 24 (Drosophila)                                                | 220               | 0.330224          | 0.1589     | Yes             |
| DDIT4    | DDIT4       | DNA-damage-inducible transcript 4                                         | 247               | 0.320453          | 0.182239   | Yes             |
| PDK1     | PDK1        | pyruvate dehydrogenase kinase, isozyme 1                                  | 271               | 0.316203          | 0.205649   | Yes             |
| B4GALNT2 | B4GALNT2    | beta-1,4-N-acetyl-galactosaminyl transferase 2                            | 273               | 0.315813          | 0.232171   | Yes             |
| RORA     | RORA        | RAR-related orphan receptor A                                             | 338               | 0.299635          | 0.24832    | Yes             |
| WSB1     | WSB1        | WD repeat and SOCS box-containing 1                                       | 349               | 0.296292          | 0.271907   | Yes             |
| RRAGD    | RRAGD       | Ras-related GTP binding D                                                 | 402               | 0.284205          | 0.28847    | Yes             |
| LARGE    | LARGE       | like-glycosyltransferase                                                  | 441               | 0.277505          | 0.306467   | Yes             |
| EFNA3    | EFNA3       | ephrin-A3                                                                 | 480               | 0.270144          | 0.323844   | Yes             |
| HK1      | HK1         | hexokinase 1                                                              | 591               | 0.253815          | 0.329548   | Yes             |
| KLF7     | KLF7        | Kruppel-like factor 7 (ubiquitous)                                        | 756               | 0.232209          | 0.325709   | Yes             |
| NR3C1    | NR3C1       | nuclear receptor subfamily 3, group C, member 1 (glucocorticoid receptor) | 801               | 0.226952          | 0.338581   | Yes             |
| ETS1     | ETS1        | v-ets erythroblastosis virus E26 oncogene homolog 1 (avian)               | 830               | 0.223343          | 0.353435   | Yes             |
| LXN      | LXN         | latexin                                                                   | 846               | 0.221438          | 0.369987   | Yes             |
| TGFBI    | TGFBI       | transforming growth factor, beta-induced, 68kDa                           | 873               | 0.219064          | 0.384767   | Yes             |
| STC1     | STC1        | stanniocalcin 1                                                           | 877               | 0.218482          | 0.402785   | Yes             |
| TMEM45A  | TMEM45A     | transmembrane protein 45A                                                 | 946               | 0.212318          | 0.41099    | Yes             |
